# Supplementary material for: Lex Britannia : Fackliga stridsåtgärders förenlighet med EG-rätten
Source: Royal Society of Chemistry journal article supplement (doi:10.1039/c4an02322f), 2005-01-01
Supplement: c4an02322f1.pdf [file c4an02322f1.pdf]

Electronic Supplementary Information (ESI)

**One step synthesis of quantum dot-magnetic nanoparticle heterodimers for dual modal  
imaging applications**

Jiyeon Lee,<sup>a,b,\*</sup> Gyoyeon Hwang,<sup>a,b</sup> Yeon Sun Hong<sup>a,c</sup> and Taebo Sim<sup>a,b,c,\*</sup>

<sup>a</sup> Chemical Kinomics Research Center, Future Convergence Research Division, Korea Institute of Science and Technology, Hwarangno 14-gil 5, Seongbuk-gu, Seoul 136-791, Korea

<sup>b</sup> Biological Chemistry, Korea University of Science and Technology, 217, Gajeong-ro, Yuseong-gu, Daejeon, Korea

<sup>c</sup> KU-KIST Graduate School of Converging Science and Technology, 145, Anam-ro, Seongbuk-gu, Seoul, 136-713, Korea

\*Corresponding author. Tel.: +82-2-958-5121; fax: +82-2-958-5189; e-mail: [jylee@kist.re.kr](mailto:jylee@kist.re.kr).

\*Corresponding author. Tel.: +82-2-958-6437; fax: +82-2-958-5189; e-mail: [tbsim@kist.re.kr](mailto:tbsim@kist.re.kr)/  
[tbsim@korea.ac.kr](mailto:tbsim@korea.ac.kr).

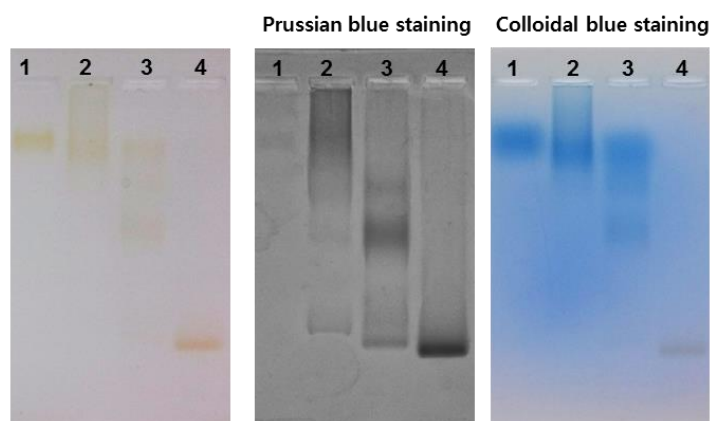

| Lane | Sample                        |
|------|-------------------------------|
| 1    | QD800-diamine                 |
| 2    | MNP-QD800                     |
| 3    | QD800-diamine and MNP mixture |
| 4    | MNP                           |

**Fig. S1** Agarose gel electrophoresis of QD800-diamine, MNP-QD800 conjugate, mixture of QD800-diamine and starting MNP. Two different gels were Prussian blue and colloidal blue stained.

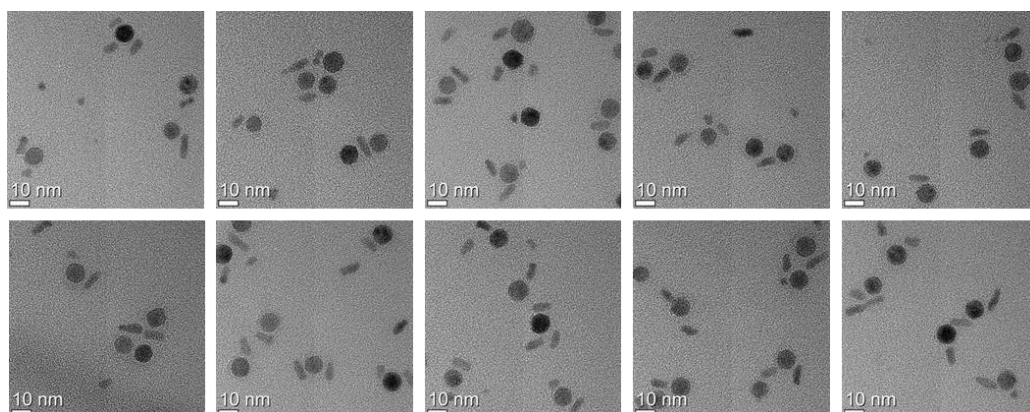

**Fig. S2** TEM analysis of the MNP-QD605 conjugate showing that two different particles are closely positioned with QD605 being rod-shaped and MNP being sphere-shaped.

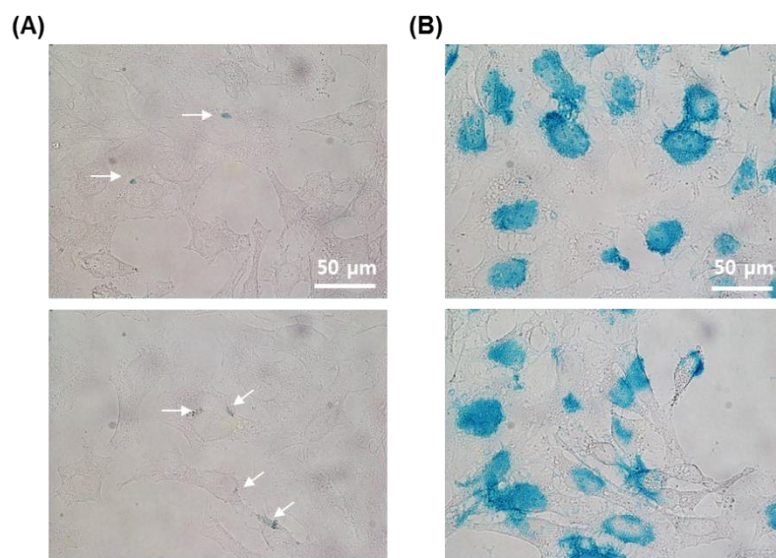

**Fig. S3** Cellular uptake of MNPs and MNP-QD800 conjugates by using Prussian blue staining and optical microscope cell imaging (10 nM of MNPs and MNP-QD800 conjugates in cell media). (A) The MNP-QD800 conjugates are localized next to the nuclei (white arrows) are positioned near nuclei of HeLa cells. (B) Starting MNPs are attached to the surfaces of the HeLa cells surface over the entire cell membrane with non-specific binding.
